# Supplementary material
Source: publisher site journal article supplement (https://www.dovepress.com/article/476993)
Supplement: Supplementary file 1 [file get_supplementary_file.php]

**Appendix 1**

The interview was developed for this study; please see the interview guiding questions below.

The guiding questions for stroke survivors were as follows:

1. What challenges have you encountered since the stroke while living in the community?
2. Do you believe that the current services provided by community healthcare facilities meet your needs?
3. What specific services do you wish your community could offer to support you better?
4. In your opinion, which areas of service require further improvement to enhance stroke care in the community?

The guiding questions for family caregivers were as follows:

1. Do you find it challenging to care for a family member who has had a stroke?
2. What services would you like community healthcare service stations to offer to help you care for your family member who had a stroke?
3. What aspects of the community do you think could be improved? Or what changes would you like to see?
